# Supplementary material for: Long-Chain Bases from Sea Cucumber Alleviate Obesity by Modulating Gut Microbiota
Source: PubMed Central journal article supplement (PMC6723202; doi:10.3390/md17080455), 2019-08-01
Supplement: marinedrugs-17-00455-s001.pdf [file marinedrugs-17-00455-s001.pdf]

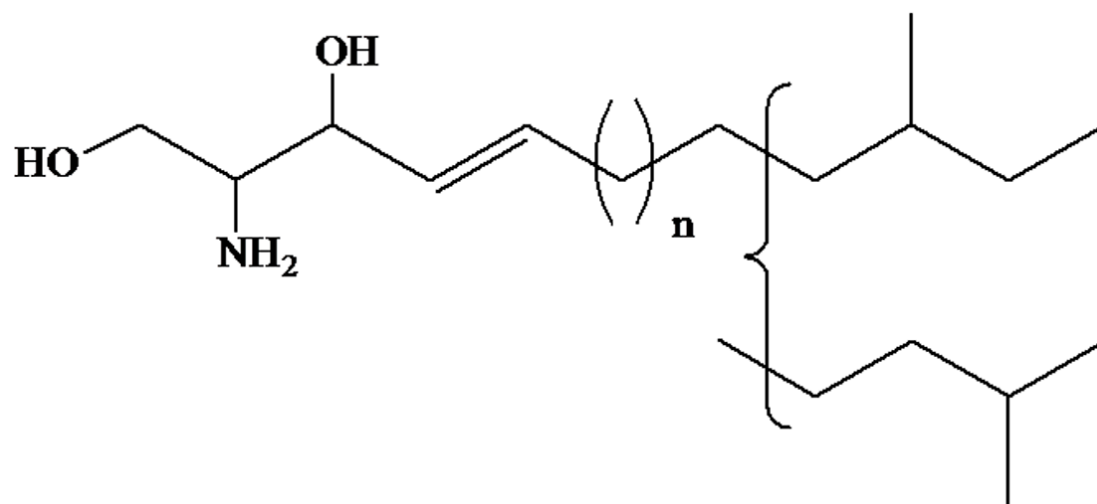

**Figure S1.** The structures of long-chain bases from the sea cucumber, *Acaudina molpadioides*.
